# Supplementary material for: Inductively coupled plasma tandem mass spectrometry (ICP-MS/MS) for the analysis of fuels, biofuels and their feedstock using a high temperature total consumption sample introduction system operated under continuous sample aspiration mode
Source: Royal Society of Chemistry journal article supplement (doi:10.1039/d2ja00024e), 2022-01-01
Supplement: d2ja00024e1.pdf [file d2ja00024e1.pdf]

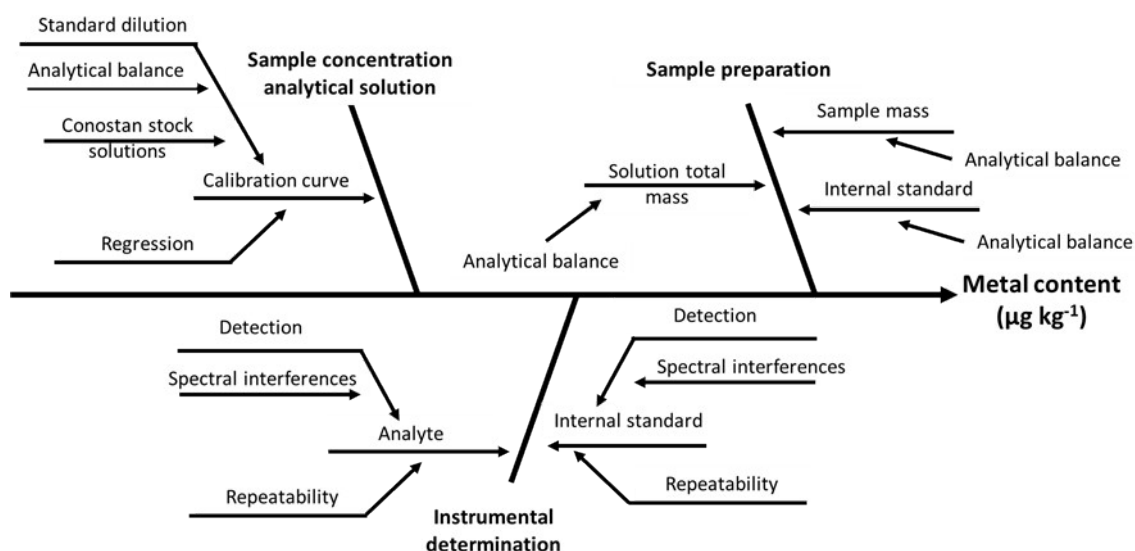

Figure S1. Ishikawa Shikawa diagram of uncertainty sources.

Table S1. Calculated t-values and s-values for the comparison between the analytical results obtained by hTISIS-ICP-MSMS analysis and by the ICP-OES reference method. Values of t lower than the critical t-value for 10 degrees of freedom and 99%-confidence level are highlighted in bold.

| Nuclide           |   | G8          | D2          | PO3        | VO4         | VO12        |
|-------------------|---|-------------|-------------|------------|-------------|-------------|
| <sup>24</sup> Mg  | t | <b>0.15</b> |             |            | 4.95        | <b>3.01</b> |
|                   | s | <b>370</b>  |             |            | 130         | <b>460</b>  |
| <sup>27</sup> Al  | t |             |             |            | 27          | <b>1.1</b>  |
|                   | s |             |             |            | 680         | <b>230</b>  |
| <sup>28</sup> Si  | t |             |             | <b>2.6</b> | <b>0.3</b>  | <b>0.8</b>  |
|                   | s |             |             | <b>1.7</b> | <b>280</b>  | <b>2.4</b>  |
| <sup>40</sup> Ca  | t |             |             |            | <b>2.6</b>  | <b>1.1</b>  |
|                   | s |             |             |            | <b>780</b>  | <b>910</b>  |
| <sup>52</sup> Cr  | t |             |             | <b>3.2</b> |             |             |
|                   | s |             |             | <b>19</b>  |             |             |
| <sup>55</sup> Mn  | t |             | <b>0.16</b> |            | <b>0.3</b>  | <b>0.06</b> |
|                   | s |             | <b>12</b>   |            | <b>47</b>   | <b>79</b>   |
| <sup>56</sup> Fe  | t | <b>1.3</b>  | <b>0.09</b> |            | <b>1.9</b>  | <b>3.5</b>  |
|                   | s | <b>27</b>   | <b>52</b>   |            | <b>1000</b> | <b>820</b>  |
| <sup>118</sup> Sn | t |             |             |            | <b>2.9</b>  |             |
|                   | s |             |             |            | <b>200</b>  |             |

**Table S2.** Procedural limits of quantification ( $\mu\text{g Kg}^{-1}$ ), pLOQ, for the different nuclides determined and samples analyzed.

| Nuclide           | Oils | Light petroleum cuts | VO2*  |
|-------------------|------|----------------------|-------|
| <sup>7</sup> Li   | 3    | 0.8                  | 15    |
| <sup>9</sup> Be   | 1.5  | 0.4                  | 8     |
| <sup>23</sup> Na  | 150  | 40                   | 800   |
| <sup>24</sup> Mg  | 140  | 40                   | 700   |
| <sup>27</sup> Al  | 15   | 4                    | 70    |
| <sup>28</sup> Si  | 400  | 100                  | 2,000 |
| <sup>32</sup> S   | 200  | 50                   | 1,000 |
| <sup>39</sup> K   | 50   | 11                   | 200   |
| <sup>40</sup> Ca  | 150  | 40                   | 800   |
| <sup>47</sup> Ti  | 12   | 3                    | 60    |
| <sup>51</sup> V   | 1.8  | 0.4                  | 9     |
| <sup>52</sup> Cr  | 6    | 1.4                  | 30    |
| <sup>55</sup> Mn  | 0.5  | 0.12                 | 3     |
| <sup>56</sup> Fe  | 5    | 1.1                  | 20    |
| <sup>60</sup> Ni  | 0.4  | 0.09                 | 1.8   |
| <sup>63</sup> Cu  | 6    | 1.6                  | 30    |
| <sup>66</sup> Zn  | 400  | 90                   | 2,000 |
| <sup>95</sup> Mo  | 4    | 1.1                  | 20    |
| <sup>107</sup> Ag | 0.7  | 0.18                 | 4     |
| <sup>111</sup> Cd | 3    | 0.7                  | 14    |
| <sup>118</sup> Sn | 4    | 1.1                  | 20    |
| <sup>121</sup> Sb | 2    | 0.5                  | 10    |
| <sup>138</sup> Ba | 5    | 1.2                  | 20    |
| <sup>208</sup> Pb | 4    | 0.9                  | 19    |

\* Dilution factor: 1:100 (sample:xylene, w/w).
